# Supplementary material
Source: Springer Nature journal article supplement (https://www.springermedizin.de/resource/supplementary/12911_2008_225_MOESM3_ESM.pdf/9527424)

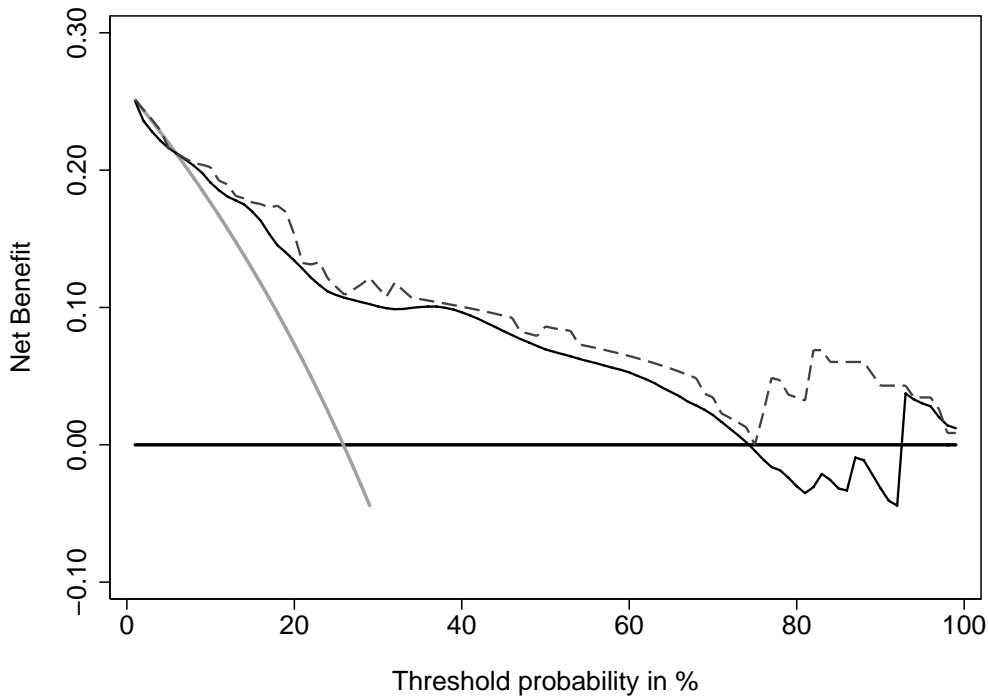

Supplement: MOESM3 [file 9527424]
